# Supplementary material for: Disease-Aging Network Reveals Significant Roles of Aging Genes in Connecting Genetic Diseases
Source: PubMed Central journal article supplement (PMC2739292; doi:10.1371/journal.pcbi.1000521), 2009-09-25
Supplement: pcbi.1000521.s006.pdf [file pcbi.1000521.s006.pdf]

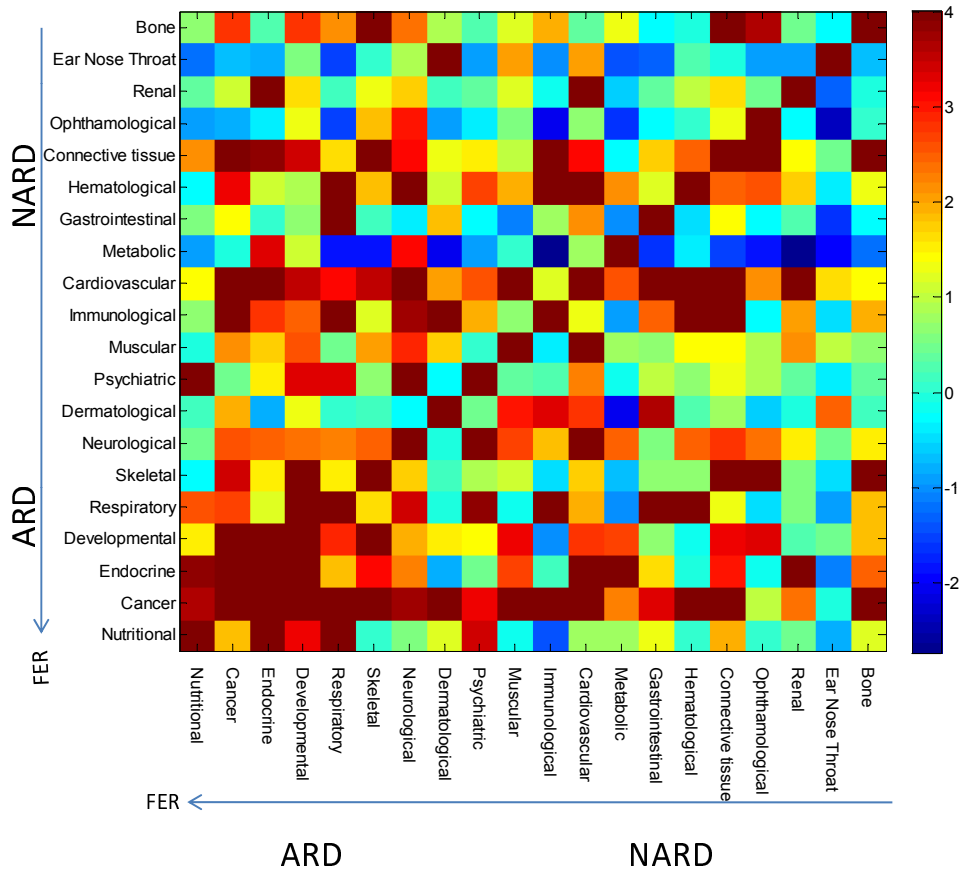

Figure S3: Z-score of closeness between different diseases. Here, we set values larger than four to be four to achieve better visualization.
