# Supplementary material for: Disease-Aging Network Reveals Significant Roles of Aging Genes in Connecting Genetic Diseases
Source: PubMed Central journal article supplement (PMC2739292; doi:10.1371/journal.pcbi.1000521), 2009-09-25
Supplement: pcbi.1000521.s007.pdf [file pcbi.1000521.s007.pdf]

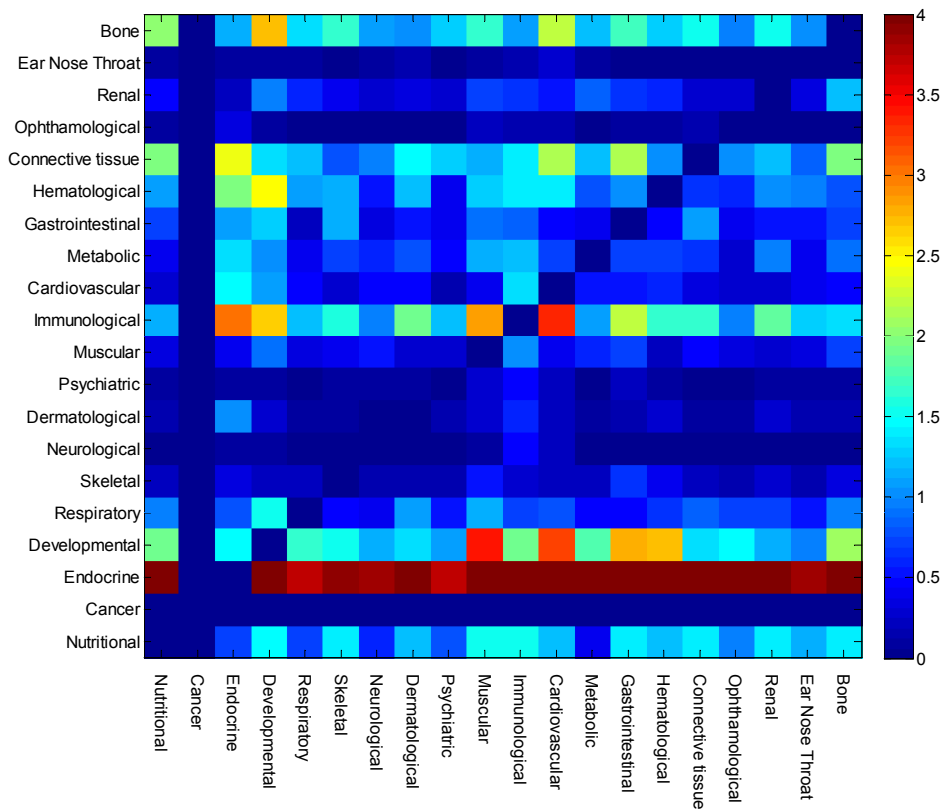

Figure S4: The bridgeness of cancer genes in every pair of diseases. Here, minus 10-based logarithm p-value is showed in the figure where values larger than four set to be four to achieve better visualization.
