# Supplementary material for: Disease-Aging Network Reveals Significant Roles of Aging Genes in Connecting Genetic Diseases
Source: PLOS journal article supplement (doi:10.1371/journal.pcbi.1000521), 2009-09-25
Supplement: S5 (10.1371/journal.pcbi.1000521.s005) [file journal.pcbi.1000521.s005]

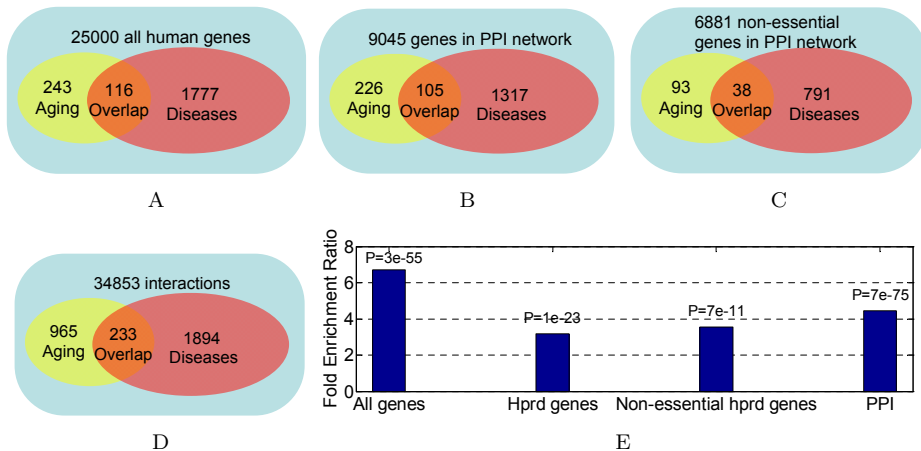

Figure S2: (A)-(D) Venn graph of overlapping between aging genes and diseases genes. Universal sets are all human genes, genes with interactions in HPRD, non-essential genes in HPRD and all gene interactions in HPRD respectively. (E) Fold enrichment ratio and p-value of the overlapping. Both genes and gene interactions show significant overlapping than random.
